# Supplementary material
Source: Springer Nature journal article supplement (https://www.springermedizin.de/resource/supplementary/13014_2012_799_MOESM5_ESM.pdf/9634536)

# Treatment response by patient according to RECIST criteria or Combined criteria

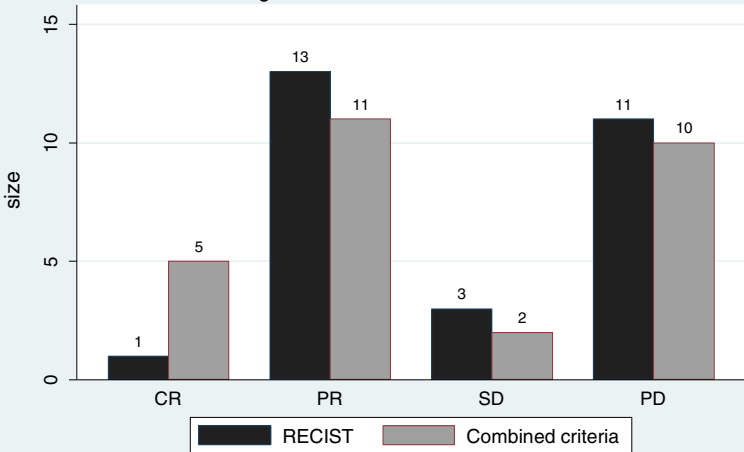

Supplement: MOESM5 [file 9634536]
